# Supplementary material for: Explainable machine learning of PROGRESS-Plus social factors predicts cognitive trajectories after traumatic brain injury
Source: Research Square preprint supplement (doi:10.21203/rs.3.rs-8585532/v1), 2026-01-28
Supplement: Supplementary file 2 [file 173601d976616e93cea6239e.docx]

Table 2. Performance of ML models for predicting rate of change in mild and moderate-severe TBI.

| ML model | MAE | | RMSE | |
| --- | --- | --- | --- | --- |
| Mild | Mod-sev | Mild | Mod-sev |
| Random Forest | 6.39 | 3.79 | 10.20 | 12.69 |
| Gradient Boosting | 6.55 | 4.61 | 11.05 | 13.41 |
| XGBoost | 6.06 | 4.48 | 10.59 | 13.85 |

Abbreviations: 5CV = 5-fold cross-validation; MAE = mean absolute error; mod-sev = moderate–severe; RMSE = root mean squared error
