# Supplementary material for: Explainable machine learning of PROGRESS-Plus social factors predicts cognitive trajectories after traumatic brain injury
Source: Research Square preprint supplement (doi:10.21203/rs.3.rs-8585532/v1), 2026-01-28
Supplement: Supplementary file 3 [file 3d628e6b61898ba45f483eb8.docx]

Table 1. PROGRESS-Plus and other characteristics of the cohorts

| **Variable** | **Overall,**  **N=218** | **Mild TBI**  **N=121** | **Mod-sev TBI**  **N=97** |
| --- | --- | --- | --- |
| P - Country of study origin: USA, n (%) | 116 (53) | 76 (63) | 39 (40) |
| P - Country of study origin: Australia, n (%) | 8 (3.7) | 0 | 8 (8.2) |
| P - Country of study origin: Brazil, n (%) | 9 (4.1) | 0 | 9 (9.3) |
| P - Country of study origin: Canada, n (%) | 8 (3.7) | 8 (6.6) | 0 |
| P - Country of study origin: China, n (%) | 15 (6.9) | 13 (11) | 2 (2.1) |
| P - Country of study origin: New Zealand, n (%) | 21 (9.6) | 10 (8.3) | 11 (11.3) |
| P - Country of study origin: Norway, n (%) | 11 (5.0) | 9 (7.4) | 2 (2.1) |
| P - Country of study origin: South Korea, n (%) | 10 (4.6) | 0 | 10 (10.3) |
| P - Country of study origin: UK | 21 (9.6) | 5 (4.1) | 16 (16.5) |
| P - Harmonized for modelling: country of English language dominance, n (%) | 158 (72.5) | 84 (69.4) | 74 (76.3) |
| R - Race/ethnicity: proportion White, n (%) | 12 (5.5) | 10 (8.3) | 2 (2.1) |
| R - Race/ethnicity: proportion other, n (%) | 2 (0.9) | 0 | 2 (2.1) |
| O - Occupation in any form, n (%) | 49 (22) | 40 (33) | 9 (9.3) |
| G - Gender/sex, mean proportion men/males* | 0.75 | 0.71 | 0.80 |
| R - Religion/spirituality, in any form, n (%) | 0 | 0 | 0 |
| E - Education in any form, n (%) | 146 (67) | 79 (65) | 67 (69) |
| E - Harmonised for modelling: mean years* | 12.3 | 12.8 | 11.7 |
| E - Harmonized for modelling: mean SD years* | 2.4 | 2.5 | 2.3 |
| S - Socioeconomic status in any form, n (%) | 0 | 0 | 0 |
| S - Social capital in any form, n (%) | 8 (3.7) | 5 (4.1) | 3 (3.1) |
| Plus - Age, mean years* | 31.9 | 32.7 | 31.1 |
| Plus - Age, SD years* | 10.8 | 10.4 | 11.4 |
| Other - Time from injury to BL, mean days* | 168 | 11.2 | 348 |
| Other - Time from BL to last FU, mean month* | 15 | 7.7 | 23.9 |
| Other - GII country of study origin, mean value* | 0.20 | 0.19 | 0.22 |
| Other - HDI country of study origin, mean value* | 0.88 | 0.89 | 0.87 |
| Outcome - Rate of change per month (median) | 0.18 | 0.23 | 0.11 |

Abbreviations: BL = baseline, FU = follow-up, Mod-sev= moderate-severe, mos = months, SD = standard deviation, TBI = traumatic brain injury *100% data availability
