# Supplementary material for: Explainable machine learning of PROGRESS-Plus social factors predicts cognitive trajectories after traumatic brain injury
Source: Research Square preprint supplement (doi:10.21203/rs.3.rs-8585532/v1), 2026-01-28
Supplement: Supplementary file 4 [file 41acb09d8140e1a6dbdb9f25.docx]

**Table X.** Hyperparameter evaluation for ML models for predicting rate of change in mild and moderate-severe TBI

| **ML model**  Hyperparameters | Search space | Selected value | |
| --- | --- | --- | --- |
| Mild | Mod-sev |
| **Random Forest** | | | |
| N estimators | integer from 50 to 300 | 77 | 100 |
| Max depth | integer from 2 to 10 | 2 | 2 |
| Min samples leaf | integer from 1 to 5 | 2 | 1 |
| Min samples split | integer from 2 to 10 | 5 | 2 |
| Max features | One of 'sqrt', 'log2', or None | sqrt | log2 |
| **Gradient Boosting** | | | |
| N estimators | integer from 50 to 300 | 111 | 67 |
| Learning rate | floating-point number from {0.01, 0.05, 0.1, 0.2} | 0.01 | 0.1 |
| Max depth | integer from 2 to 10 | 9 | 6 |
| Sub sample | floating-point number from {0.6, 0.8, 1.0} | 0.6 | 0.6 |
| Min samples leaf | integer from 1 to 5 | 3 | 1 |
| **XGBoost** | | | |
| N estimators | integer from 50 to 300 | 55 | 87 |
| Learning rate | floating-point number uniformly distributed between 0.01 and 0.2 | 0.019 | 0.026 |
| Max depth | integer from 2 to 10 | 5 | 9 |
| Min child weight | integer from 1 to 10 | 5 | 1 |
| Sub sample | floating-point number uniformly distributed between 0.4 and 0.6 | 0.622 | 0.621 |
| Col-sample bytree | floating-point number uniformly distributed between 0.4 and 0.6 | 0.743 | 0.732 |

Abbreviations: Max = maximum; Min = minimum; ML= machine learning; Mod-sev = Moderate to severe; N = number; sqrt = square root
