# Supplementary material for: Explainable machine learning of PROGRESS-Plus social factors predicts cognitive trajectories after traumatic brain injury
Source: Research Square preprint supplement (doi:10.21203/rs.3.rs-8585532/v1), 2026-01-28
Supplement: Supplementary file 5 [file a3ecbc1492c07a2522b70493.docx]

Table 4. Performance of 5-fold ML models for predicting rate of change in mild and moderate-severe TBI.

| ML model | MAE 5 CV | | RMSE 5 CV | |
| --- | --- | --- | --- | --- |
| Mild | Mod-sev | Mild | Mod-sev |
| Random Forest | 7.17 ± 1.42 | 4.22 ± 2.50 | 14.36 ± 3.17 | 11.78 ± 5.06 |
| Gradient Boosting | 7.27 ± 1.75 | 4.21 ± 2.55 | 14.20 ± 3.72 | 11.94 ± 5.39 |
| XGBoost | 7.07 ± 1.58 | 4.50 ± 2.56 | 14.11 ± 3.84 | 12.21 ± 5.37 |

Abbreviations: 5CV = 5-fold cross-validation; MAE = mean absolute error; ML= machine learning; mod-sev = moderate–severe RMSE = root mean squared error; XGBoost = extreme gradient boosting
